# Supplementary material for: Flufenamic acid improves survival and neurologic outcome after successful cardiopulmonary resuscitation in mice
Source: Springer Nature journal article supplement (doi:10.1186/s12974-022-02571-2), 2022-09-01
Supplement: MOESM1 [file 23441988]

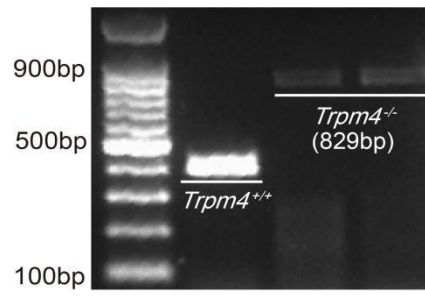

**Supplemental Figure 1. Results of agarose gel electrophoresis of tail DNA from WT and *Trpm4<sup>-/-</sup>* mice.**

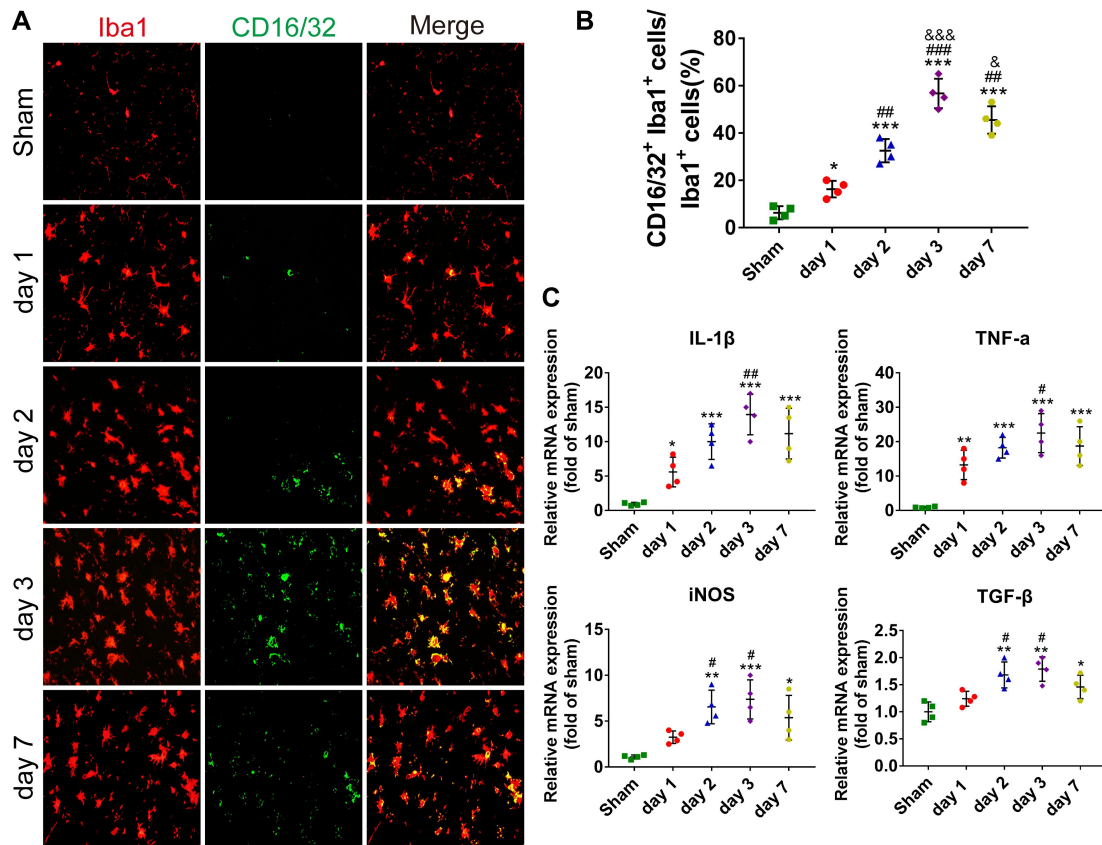

**Supplemental Figure 2. Dynamic changes in pro-inflammatory microglia/macrophage polarization and mRNA expression of inflammatory markers following CA/CPR.**

(A) Representative photomicrographs of immunofluorescence staining for CD16/32 (green) and Iba1 (red) in the brains in the sham and different CA/CPR groups (at day 1, day 2, day 3, and day 7 after ROSC, respectively). Scale bar, 50  $\mu$ m. (B) Quantification of the percentage of CD16/32 and Iba1 double-positive cells. (C) qPCR results of inflammatory markers in the brains at at day 1, day 2, day 3, and day 7 after ROSC. \* $P$ <0.05, \*\* $P$ <0.01, \*\*\* $P$ <0.001 versus the sham group; # $P$ <0.05, ## $P$ <0.01, ### $P$ <0.001 versus the day 1 group; & $P$ <0.05, &&& $P$ <0.001 versus the day 2 group.  $n = 4$ .

**Supplemental Table 1. Parameters of the vehicle and FFA groups at baseline and during post-CA care after ROSC.**

| Parameters                    | Time points | Vehicle        | FFA            |
|-------------------------------|-------------|----------------|----------------|
| Body weight, g                | Baselines   | 26.35 ± 1.08   | 26.74 ± 1.09   |
| Time required for ROSC, s     | Baselines   | 124.93 ± 17.17 | 130.05 ± 15.07 |
| Total dose of epinephrine, µg | Baselines   | 8.34 ± 0.57    | 8.18 ± 0.46    |
| Heart rate, beats/min         | Baselines   | 536.63 ± 14.89 | 531.73 ± 12.14 |
|                               | 10 minutes  | 504.78 ± 12.83 | 509.78 ± 14.06 |
|                               | 30 minutes  | 551.30 ± 14.90 | 547.78 ± 10.98 |
|                               | 60 minutes  | 541.90 ± 12.46 | 537.55 ± 8.04  |

**Supplemental Table 2. Parameters of the WT, KO and KO (FFA) groups at baseline and during post-CA after ROSC.**

| Parameters                    | Time points | WT             | KO             | KO (FFA)       |
|-------------------------------|-------------|----------------|----------------|----------------|
| Body weight, g                | Baselines   | 26.29 ± 0.78   | 25.95 ± 0.61   | 26.18 ± 0.67   |
| Time required for ROSC, s     | Baselines   | 123.36 ± 12.48 | 128.86 ± 14.36 | 132.14 ± 15.51 |
| Total dose of epinephrine, µg | Baselines   | 8.40 ± 0.61    | 8.27 ± 0.49    | 8.45 ± 0.60    |
| Heart rate, beats/min         | Baselines   | 530.36 ± 14.70 | 524.29 ± 18.69 | 522.00 ± 11.72 |
|                               | 10 minutes  | 510.07 ± 15.65 | 505.78 ± 19.15 | 512.14 ± 10.60 |
|                               | 30 minutes  | 541.14 ± 18.75 | 543.79 ± 14.69 | 550.57 ± 13.83 |
|                               | 60 minutes  | 540.36 ± 14.35 | 530.43 ± 18.32 | 533.07 ± 17.87 |
